# Supplementary material
Source: PubMed Central journal article supplement (PMC1201594)

## Lung function responses to antigen and methacholine

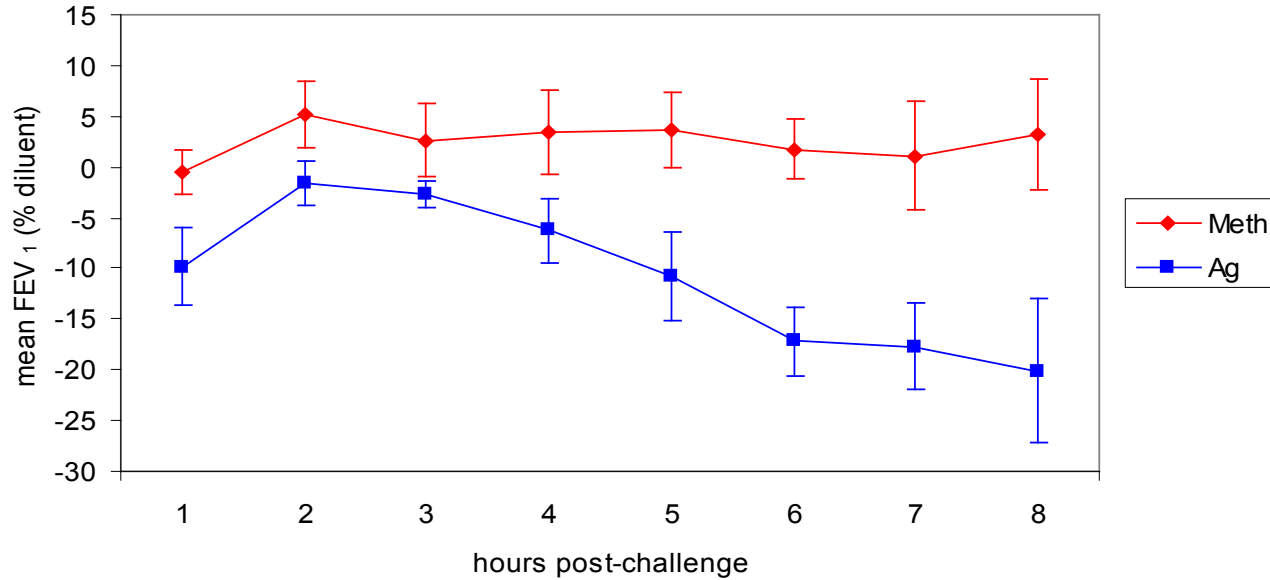

Supplement: pnas_0504365102_1.pdf [file pnas_0504365102_1.pdf]
